# Supplementary material for: Influence of solvent on porosity and microstructure of an yttrium based aerogel
Source: Royal Society of Chemistry journal article supplement (doi:10.1039/c0jm03178j), 2011-01-01
Supplement: c0jm03178j.pdf [file c0jm03178j.pdf]

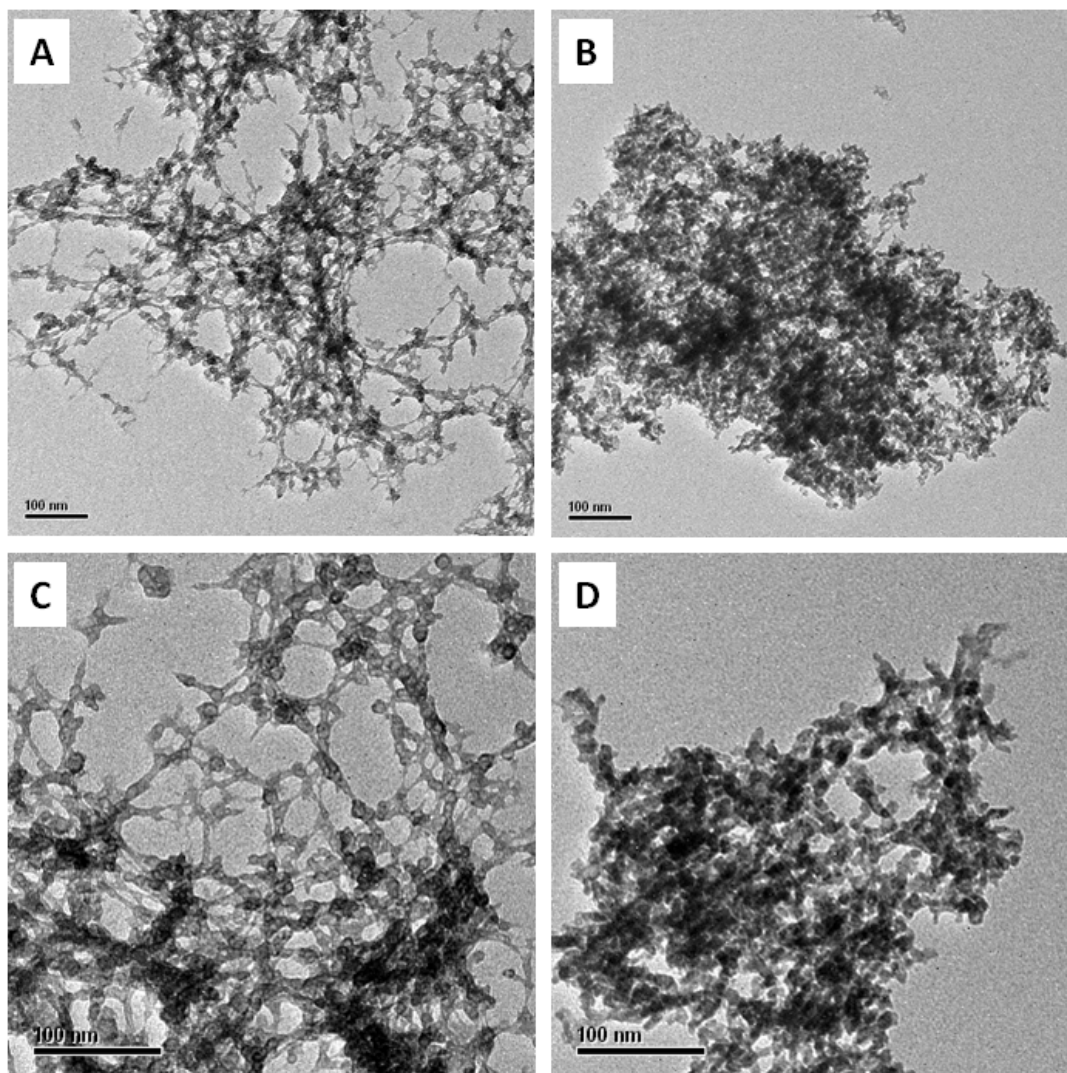

S1. TEM micrographs of a yttrium-based aerogel produced in (A,C) ethanol, and (B,D) methanol.

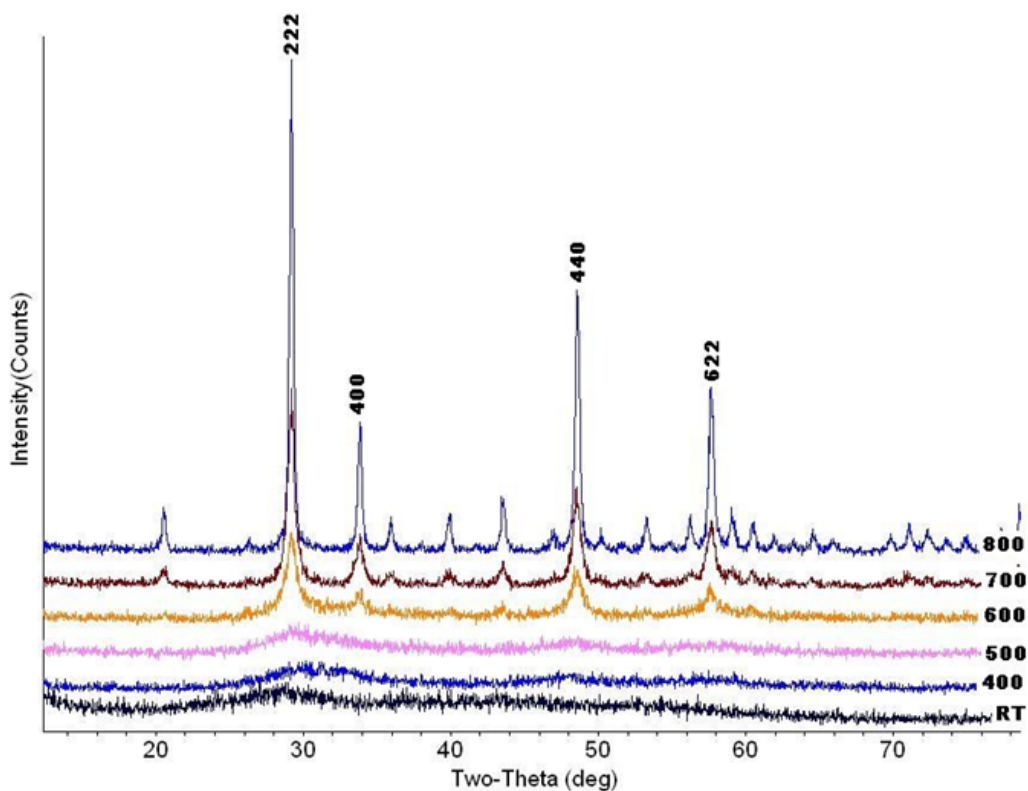

S2. X-ray diffraction patterns of a yttrium-based xerogel annealed at various temperatures

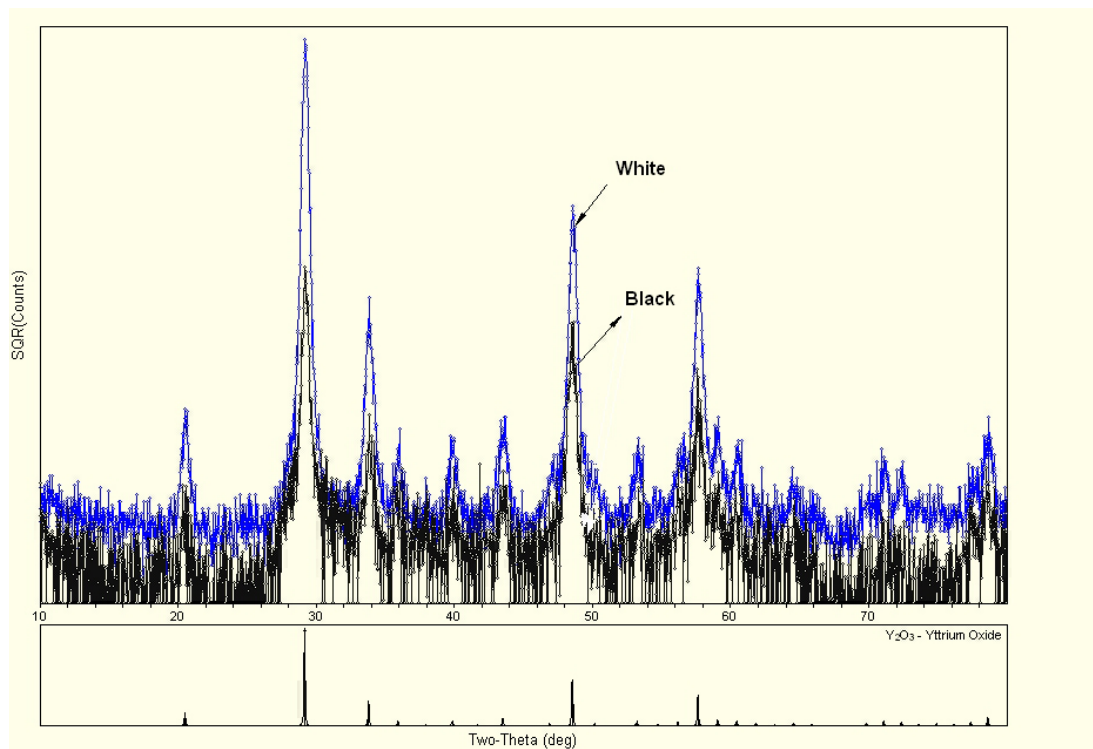

S3. X-ray diffraction patterns for white and black yttrium oxides in the blue and black lines respectively.
